# Supplementary material
Source: MDPI journal article supplement (https://www.mdpi.com/2071-1050/11/14/3867)
Supplement: s1 [file s1]

## Supplementary Materials

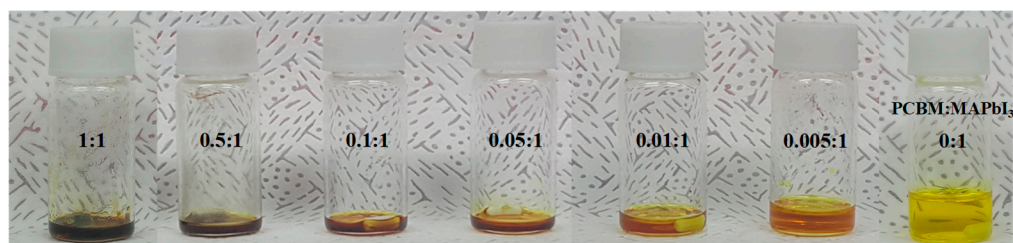

**Figure S1.** Photograph of the MAPbI<sub>3</sub> precursor solution. The mixed materials made using solutions with various PCBM additive concentrations (5, 10, 50, 100, 500, and 1000  $\mu$ L) and a 1000- $\mu$ L MAPbI<sub>3</sub> solution are presented in this figure. As shown in this figure, the pristine PCBM-MAPbI<sub>3</sub> precursor (0:1) solution exhibited a bright yellow color, and its color changed to dark brown with an increase in the PCBM concentration from 0.005 to 1.

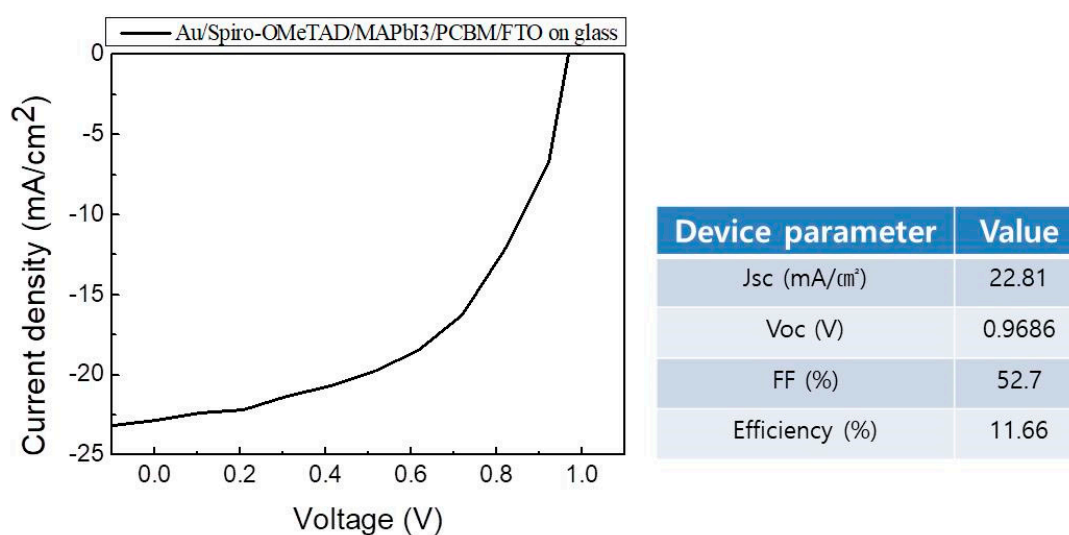

**Figure S2.** J–V characteristics of the FTO/PCBM/MAPbI<sub>3</sub>/Spiro-OMeTAD/Au solar cells.

**Table S1.** Grain sizes (unit: Å) of the perovskite films.

| Film                         | Bragg peak |         |         |         |
|------------------------------|------------|---------|---------|---------|
|                              | 002        | 004     | 006     | 400     |
| MAPbI <sub>3</sub>           | 197.487    | 213.255 | 219.4   | 158.555 |
| MAPbI <sub>3</sub> with PCBM | 197.795    | 209.947 | 211.894 | 145.317 |
